# Supplementary material
Source: HighWire-hosted journal article supplement (https://sit.bmj.com/highwire/filestream/357/field_highwire_adjunct_files/1/bmjsit-2020-000071supp002_data_supplement.pdf)
Supplement: bmjsit-2020-000071supp002_data_supplement.pdf [file bmjsit-2020-000071supp002_data_supplement.pdf]

**Table S2: Cost (in £ per patient) of managing the complications reported by patients during the UK-ROPE study**

| Complication           | Cost (£ per patient) |
|------------------------|----------------------|
| Haematuria             | 1316.50*             |
| Haematospermia         | 0                    |
| Incontinence           | 1,203.33             |
| Urinary infection      | 10.04                |
| Retrograde ejaculation | 0                    |

\*The cost of managing haematuria included in sensitivity analysis 3 only (all other analyses assume the cost of managing haematuria to be nil)
